# Supplementary material for: Prognosis of high‐risk human papillomavirus‐related cervical lesions: A hidden Markov model analysis of a single‐center cohort in Japan
Source: PubMed Central journal article supplement (PMC8817087; doi:10.1002/cam4.4470), 2021-12-17

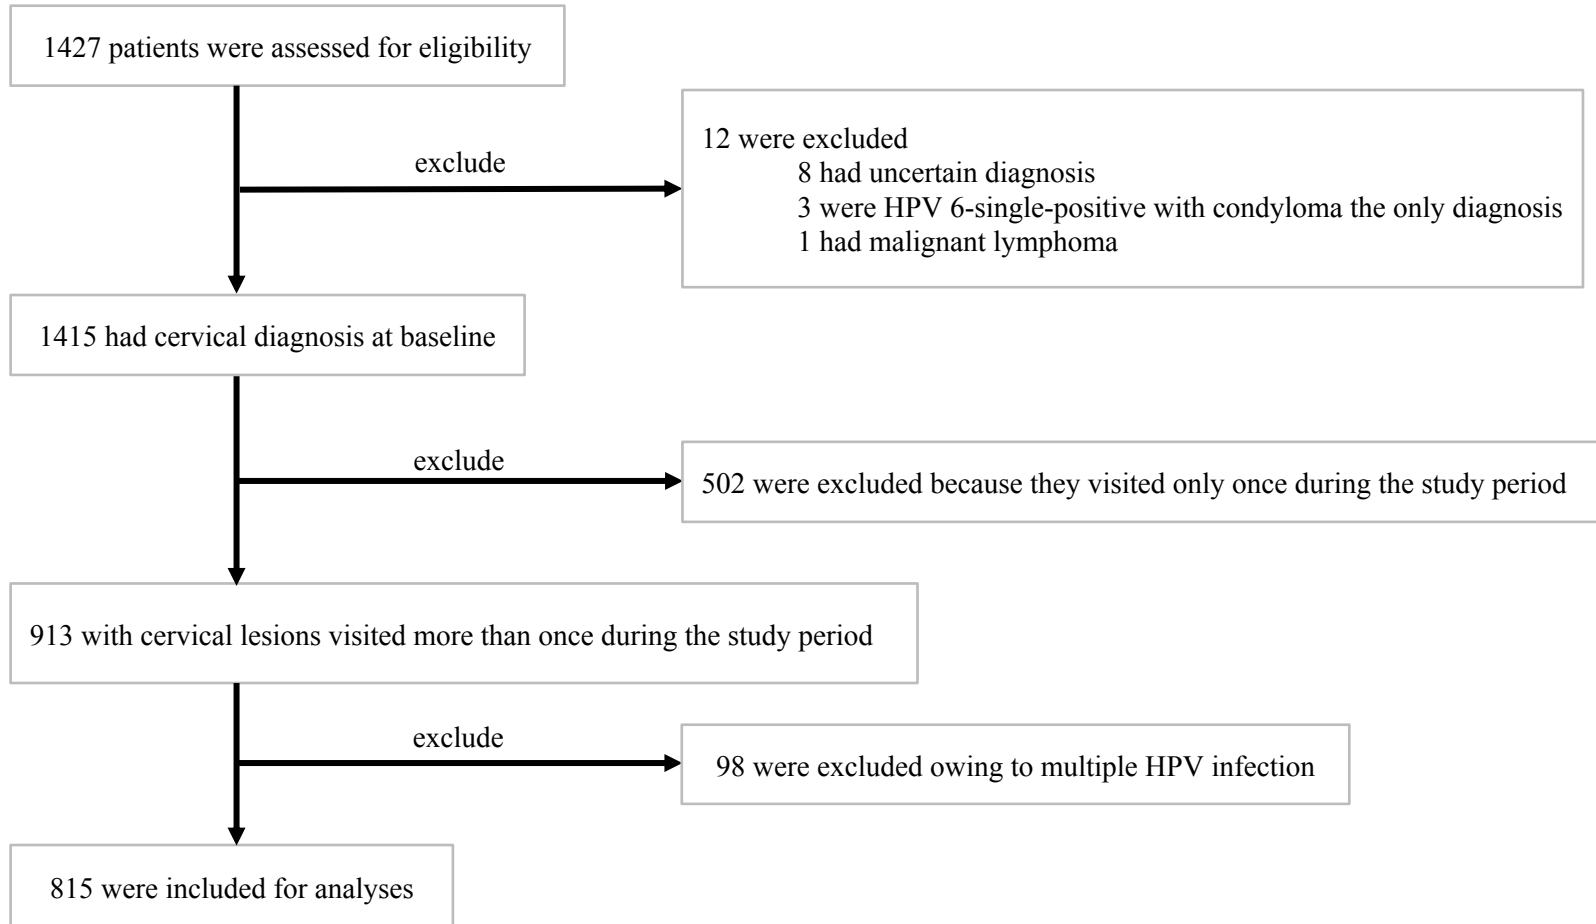

Supplement: CAM4-11-664-s005.pdf [file CAM4-11-664-s005.pdf]
